# Supplementary material
Source: PubMed Central journal article supplement (PMC3377936)

**S1: Rank conformer populations (%) and free energies (G, kcal mol<sup>-1</sup>) in each 10  $\mu$ s simulation: TIP3P**

| <b><math>\alpha</math>-L-idose</b> |          |          | <b><math>\beta</math>-L-idose</b> |          |          |
|------------------------------------|----------|----------|-----------------------------------|----------|----------|
| <b>Pucker</b>                      | <b>%</b> | <b>G</b> | <b>Pucker</b>                     | <b>%</b> | <b>G</b> |
| <b>1C4</b>                         | 85.0768  | 0.10     | <b>1C4</b>                        | 99.5250  | 0.00     |
| <b>4C1</b>                         | 5.1057   | 1.76     | <b>4C1</b>                        | 0.2935   | 3.46     |
| <b>B14</b>                         | 3.6629   | 1.96     | <b>5S1</b>                        | 0.0951   | 4.13     |
| <b>5S1</b>                         | 1.8638   | 2.36     | <b>B14</b>                        | 0.0216   | 5.01     |
| <b>3S1</b>                         | 1.6036   | 2.45     | <b>25B</b>                        | 0.0136   | 5.28     |
| <b>2SO</b>                         | 1.0151   | 2.72     | <b>14B</b>                        | 0.0116   | 5.37     |
| <b>1S3</b>                         | 0.5348   | 3.10     | <b>2SO</b>                        | 0.0101   | 5.46     |
| <b>14B</b>                         | 0.4002   | 3.27     | <b>1S5</b>                        | 0.0053   | 5.84     |
| <b>B3O</b>                         | 0.3350   | 3.38     | <b>3S1</b>                        | 0.0046   | 5.92     |
| <b>25B</b>                         | 0.1395   | 3.90     | <b>1S3</b>                        | 0.0036   | 6.07     |
| <b>1S5</b>                         | 0.0992   | 4.10     | <b>2H1</b>                        | 0.0036   | 6.07     |
| <b>E2</b>                          | 0.0276   | 4.86     | <b>B3O</b>                        | 0.0024   | 6.31     |
| <b>1HO</b>                         | 0.0231   | 4.97     | <b>5HO</b>                        | 0.0018   | 6.48     |
| <b>1E</b>                          | 0.0226   | 4.98     | <b>2E</b>                         | 0.0013   | 6.67     |
| <b>3H2</b>                         | 0.0202   | 5.04     | <b>5E</b>                         | 0.0009   | 6.89     |
| <b>1H2</b>                         | 0.0181   | 5.11     | <b>5H4</b>                        | 0.0009   | 6.89     |
| <b>3OB</b>                         | 0.0129   | 5.31     | <b>3E</b>                         | 0.0008   | 6.96     |
| <b>2H1</b>                         | 0.0084   | 5.57     | <b>1HO</b>                        | 0.0007   | 7.04     |
| <b>EO</b>                          | 0.0062   | 5.75     | <b>3H2</b>                        | 0.0007   | 7.04     |
| <b>4H3</b>                         | 0.0044   | 5.95     | <b>E4</b>                         | 0.0006   | 7.13     |
| <b>3E</b>                          | 0.0042   | 5.98     | <b>3H4</b>                        | 0.0006   | 7.13     |
| <b>E1</b>                          | 0.0034   | 6.10     | <b>EO</b>                         | 0.0006   | 7.13     |
| <b>2E</b>                          | 0.0027   | 6.24     | <b>E1</b>                         | 0.0003   | 7.54     |
| <b>OS2</b>                         | 0.0016   | 6.55     | <b>2H3</b>                        | 0.0003   | 7.54     |
| <b>E3</b>                          | 0.0013   | 6.67     | <b>1H2</b>                        | 0.0003   | 7.54     |
| <b>2H3</b>                         | 0.0013   | 6.67     | <b>1E</b>                         | 0.0001   | 8.19     |
| <b>3H4</b>                         | 0.0011   | 6.77     | <b>E2</b>                         | 0.0001   | 8.19     |
| <b>4E</b>                          | 0.0010   | 6.83     | <b>OS2</b>                        | 0.0000   | -        |
| <b>5HO</b>                         | 0.0007   | 7.04     | <b>B25</b>                        | 0.0000   | -        |
| <b>OH5</b>                         | 0.0005   | 7.24     | <b>3OB</b>                        | 0.0000   | -        |
| <b>E5</b>                          | 0.0004   | 7.37     | <b>OH5</b>                        | 0.0000   | -        |
| <b>OH1</b>                         | 0.0004   | 7.37     | <b>E5</b>                         | 0.0000   | -        |
| <b>5H4</b>                         | 0.0004   | 7.37     | <b>4H5</b>                        | 0.0000   | -        |
| <b>E4</b>                          | 0.0004   | 7.37     | <b>4E</b>                         | 0.0000   | -        |
| <b>4H5</b>                         | 0.0002   | 7.78     | <b>4H3</b>                        | 0.0000   | -        |
| <b>B25</b>                         | 0.0001   | 8.19     | <b>OE</b>                         | 0.0000   | -        |
| <b>OE</b>                          | 0.0001   | 8.19     | <b>E3</b>                         | 0.0000   | -        |
| <b>5E</b>                          | 0.0001   | 8.19     | <b>OH1</b>                        | 0.0000   | -        |

**S2: Rank conformer populations (%) and free energies (G, kcal mol<sup>-1</sup>) in each 10  $\mu$ s simulation: TIP4P**

| <b><math>\alpha</math>-L-idose</b> |          |          | <b><math>\beta</math>-L-idose</b> |          |          |
|------------------------------------|----------|----------|-----------------------------------|----------|----------|
| <b>Pucker</b>                      | <b>%</b> | <b>G</b> | <b>Pucker</b>                     | <b>%</b> | <b>G</b> |
| <b>1C4</b>                         | 83.8761  | 0.10     | <b>1C4</b>                        | 99.3885  | 0.00     |
| <b>4C1</b>                         | 7.4671   | 1.54     | <b>4C1</b>                        | 0.4079   | 3.26     |
| <b>B14</b>                         | 2.7886   | 2.12     | <b>5S1</b>                        | 0.0874   | 4.18     |
| <b>5S1</b>                         | 1.8636   | 2.36     | <b>25B</b>                        | 0.0215   | 5.01     |
| <b>3S1</b>                         | 1.2563   | 2.60     | <b>B14</b>                        | 0.0203   | 5.04     |
| <b>2SO</b>                         | 1.1235   | 2.66     | <b>2SO</b>                        | 0.0191   | 5.08     |
| <b>1S3</b>                         | 0.5407   | 3.10     | <b>14B</b>                        | 0.0187   | 5.09     |
| <b>B3O</b>                         | 0.3525   | 3.35     | <b>1S3</b>                        | 0.0085   | 5.56     |
| <b>14B</b>                         | 0.3413   | 3.37     | <b>B3O</b>                        | 0.0057   | 5.80     |
| <b>25B</b>                         | 0.1729   | 3.77     | <b>3S1</b>                        | 0.0048   | 5.90     |
| <b>1S5</b>                         | 0.0692   | 4.31     | <b>1S5</b>                        | 0.0041   | 5.99     |
| <b>E2</b>                          | 0.0216   | 5.01     | <b>2H1</b>                        | 0.0032   | 6.14     |
| <b>1HO</b>                         | 0.0211   | 5.02     | <b>3H2</b>                        | 0.0014   | 6.63     |
| <b>3H2</b>                         | 0.0193   | 5.07     | <b>3E</b>                         | 0.0013   | 6.67     |
| <b>1E</b>                          | 0.0191   | 5.08     | <b>5HO</b>                        | 0.0009   | 6.89     |
| <b>1H2</b>                         | 0.0136   | 5.28     | <b>5E</b>                         | 0.0008   | 6.96     |
| <b>3OB</b>                         | 0.0115   | 5.38     | <b>3H4</b>                        | 0.0008   | 6.96     |
| <b>2H1</b>                         | 0.0082   | 5.58     | <b>2E</b>                         | 0.0007   | 7.04     |
| <b>EO</b>                          | 0.0051   | 5.86     | <b>E4</b>                         | 0.0007   | 7.04     |
| <b>4H3</b>                         | 0.0044   | 5.95     | <b>EO</b>                         | 0.0007   | 7.04     |
| <b>3E</b>                          | 0.0036   | 6.07     | <b>1HO</b>                        | 0.0007   | 7.04     |
| <b>2H3</b>                         | 0.0034   | 6.10     | <b>E1</b>                         | 0.0005   | 7.24     |
| <b>E1</b>                          | 0.0033   | 6.12     | <b>5H4</b>                        | 0.0005   | 7.24     |
| <b>E3</b>                          | 0.0032   | 6.14     | <b>E2</b>                         | 0.0005   | 7.24     |
| <b>2E</b>                          | 0.0032   | 6.14     | <b>2H3</b>                        | 0.0004   | 7.37     |
| <b>OS2</b>                         | 0.0013   | 6.67     | <b>E3</b>                         | 0.0002   | 7.78     |
| <b>4E</b>                          | 0.0013   | 6.67     | <b>1H2</b>                        | 0.0001   | 8.19     |
| <b>E5</b>                          | 0.0011   | 6.77     | <b>1E</b>                         | 0.0001   | 8.19     |
| <b>5HO</b>                         | 0.0009   | 6.89     | <b>OS2</b>                        | 0.0000   | -        |
| <b>3H4</b>                         | 0.0006   | 7.13     | <b>B25</b>                        | 0.0000   | -        |
| <b>4H5</b>                         | 0.0005   | 7.24     | <b>3OB</b>                        | 0.0000   | -        |
| <b>5H4</b>                         | 0.0005   | 7.24     | <b>OH5</b>                        | 0.0000   | -        |
| <b>E4</b>                          | 0.0005   | 7.24     | <b>E5</b>                         | 0.0000   | -        |
| <b>OH5</b>                         | 0.0003   | 7.54     | <b>4H5</b>                        | 0.0000   | -        |
| <b>OE</b>                          | 0.0002   | 7.78     | <b>4E</b>                         | 0.0000   | -        |
| <b>OH1</b>                         | 0.0002   | 7.78     | <b>4H3</b>                        | 0.0000   | -        |
| <b>B25</b>                         | 0.0001   | 8.19     | <b>OE</b>                         | 0.0000   | -        |
| <b>5E</b>                          | 0.0001   | 8.19     | <b>OH1</b>                        | 0.0000   | -        |

**S3: Rank conformer populations (%) and free energies (G, kcal mol<sup>-1</sup>) in each 10  $\mu$ s simulation: TIP4P-EW**

| $\alpha$ -L-idose |         |      | $\beta$ -L-idose |         |      |
|-------------------|---------|------|------------------|---------|------|
| Pucker            | %       | G    | Pucker           | %       | G    |
| 1C4               | 83.5423 | 0.11 | 1C4              | 99.7812 | 0.00 |
| 4C1               | 7.7207  | 1.52 | 4C1              | 0.1318  | 3.93 |
| B14               | 2.9498  | 2.09 | 5S1              | 0.0353  | 4.71 |
| 5S1               | 1.8320  | 2.37 | 25B              | 0.0085  | 5.56 |
| 3S1               | 1.3716  | 2.54 | 2SO              | 0.0076  | 5.62 |
| 2SO               | 1.0413  | 2.71 | 14B              | 0.0071  | 5.66 |
| 1S3               | 0.5036  | 3.14 | B14              | 0.0066  | 5.71 |
| 14B               | 0.3321  | 3.38 | 1S3              | 0.0039  | 6.02 |
| B3O               | 0.3209  | 3.40 | 1S5              | 0.0029  | 6.20 |
| 25B               | 0.1578  | 3.83 | B3O              | 0.0027  | 6.24 |
| 1S5               | 0.0749  | 4.27 | 3S1              | 0.0025  | 6.28 |
| 1HO               | 0.0236  | 4.95 | 5HO              | 0.0017  | 6.51 |
| E2                | 0.0217  | 5.00 | 2H1              | 0.0015  | 6.59 |
| 1E                | 0.0187  | 5.09 | 3E               | 0.0011  | 6.77 |
| 3H2               | 0.0184  | 5.10 | 5E               | 0.0008  | 6.96 |
| 3OB               | 0.0136  | 5.28 | 5H4              | 0.0008  | 6.96 |
| 1H2               | 0.0127  | 5.32 | 3H2              | 0.0007  | 7.04 |
| 2H1               | 0.0075  | 5.63 | 2E               | 0.0006  | 7.13 |
| EO                | 0.0052  | 5.85 | E4               | 0.0006  | 7.13 |
| 4H3               | 0.0047  | 5.91 | EO               | 0.0005  | 7.24 |
| E1                | 0.0042  | 5.98 | E2               | 0.0005  | 7.24 |
| 2E                | 0.0041  | 5.99 | 3H4              | 0.0004  | 7.37 |
| 2H3               | 0.0039  | 6.02 | 3OB              | 0.0002  | 7.78 |
| 3E                | 0.0033  | 6.12 | 1HO              | 0.0002  | 7.78 |
| E3                | 0.0031  | 6.16 | E1               | 0.0001  | 8.19 |
| 4E                | 0.0018  | 6.48 | 1H2              | 0.0001  | 8.19 |
| OS2               | 0.0015  | 6.59 | 1E               | 0.0001  | 8.19 |
| 4H5               | 0.0011  | 6.77 | OS2              | 0.0000  | -    |
| E5                | 0.0006  | 7.13 | B25              | 0.0000  | -    |
| OH5               | 0.0005  | 7.24 | OH5              | 0.0000  | -    |
| 5HO               | 0.0005  | 7.24 | E5               | 0.0000  | -    |
| E4                | 0.0005  | 7.24 | 4H5              | 0.0000  | -    |
| 3H4               | 0.0005  | 7.24 | 4E               | 0.0000  | -    |
| OE                | 0.0003  | 7.54 | 4H3              | 0.0000  | -    |
| OH1               | 0.0003  | 7.54 | OE               | 0.0000  | -    |
| 5H4               | 0.0003  | 7.54 | E3               | 0.0000  | -    |
| B25               | 0.0002  | 7.78 | OH1              | 0.0000  | -    |
| 5E                | 0.0002  | 7.78 | 2H3              | 0.0000  | -    |

**S4: Rank conformer populations (%) and free energies (G, kcal mol<sup>-1</sup>) in each 10  $\mu$ s simulation: GAS-PHASE**

| $\alpha$ -L-idose |         |      | $\beta$ -L-idose |         |      |
|-------------------|---------|------|------------------|---------|------|
| Pucker            | %       | G    | Pucker           | %       | G    |
| 1C4               | 92.3800 | 0.05 | 1C4              | 98.6260 | 0.01 |
| 4C1               | 5.7121  | 1.70 | 4C1              | 1.2204  | 2.61 |
| B3O               | 0.5734  | 3.06 | 5S1              | 0.0406  | 4.63 |
| 1S3               | 0.3761  | 3.31 | 1S3              | 0.0227  | 4.98 |
| 2SO               | 0.3418  | 3.37 | 5HO              | 0.0112  | 5.39 |
| 5S1               | 0.2542  | 3.54 | B14              | 0.0111  | 5.40 |
| B14               | 0.1289  | 3.95 | B3O              | 0.0105  | 5.43 |
| 14B               | 0.0830  | 4.21 | 14B              | 0.0094  | 5.50 |
| 1HO               | 0.0190  | 5.08 | EO               | 0.0074  | 5.64 |
| 3S1               | 0.0187  | 5.09 | 2SO              | 0.0072  | 5.66 |
| 1S5               | 0.0179  | 5.12 | 2E               | 0.0054  | 5.83 |
| EO                | 0.0164  | 5.17 | 5E               | 0.0052  | 5.85 |
| 25B               | 0.0144  | 5.25 | 1S5              | 0.0045  | 5.94 |
| 1E                | 0.0116  | 5.37 | 2H3              | 0.0036  | 6.07 |
| 2H3               | 0.0095  | 5.49 | 25B              | 0.0030  | 6.18 |
| 2E                | 0.0086  | 5.55 | 3S1              | 0.0027  | 6.24 |
| E3                | 0.0084  | 5.57 | 2H1              | 0.0024  | 6.31 |
| 2H1               | 0.0059  | 5.77 | E3               | 0.0020  | 6.42 |
| 5HO               | 0.0051  | 5.86 | 5H4              | 0.0010  | 6.83 |
| 4H3               | 0.0048  | 5.90 | 4H3              | 0.0009  | 6.89 |
| 3OB               | 0.0028  | 6.22 | 1HO              | 0.0009  | 6.89 |
| 1H2               | 0.0021  | 6.39 | 3H2              | 0.0006  | 7.13 |
| E2                | 0.0017  | 6.51 | 3OB              | 0.0003  | 7.54 |
| E1                | 0.0010  | 6.83 | 1H2              | 0.0002  | 7.78 |
| 5E                | 0.0009  | 6.89 | OS2              | 0.0001  | 8.19 |
| 3H2               | 0.0004  | 7.37 | B25              | 0.0001  | 8.19 |
| 4E                | 0.0003  | 7.54 | 4E               | 0.0001  | 8.19 |
| 4H5               | 0.0002  | 7.78 | 1E               | 0.0001  | 8.19 |
| OS2               | 0.0001  | 8.19 | E4               | 0.0001  | 8.19 |
| OH1               | 0.0001  | 8.19 | 3H4              | 0.0001  | 8.19 |
| 5H4               | 0.0001  | 8.19 | E1               | 0.0000  | -    |
| 3E                | 0.0001  | 8.19 | OH5              | 0.0000  | -    |
| B25               | 0.0000  | -    | E5               | 0.0000  | -    |
| OH5               | 0.0000  | -    | 4H5              | 0.0000  | -    |
| E5                | 0.0000  | -    | OE               | 0.0000  | -    |
| OE                | 0.0000  | -    | OH1              | 0.0000  | -    |
| E4                | 0.0000  | -    | 3E               | 0.0000  | -    |
| 3H4               | 0.0000  | -    | E2               | 0.0000  | -    |

**S5: Averages and standard deviations of computed Cremer-Pople parameters (chair-puckers)**

|                   |                  | TIP3P |       | TIP4P |       | TIP4P-EW |       |
|-------------------|------------------|-------|-------|-------|-------|----------|-------|
|                   |                  | AVE   | STDEV | AVE   | STDEV | AVE      | STDEV |
| $\vartheta^\circ$ | $\alpha^{-1}C_4$ | 168.6 | 5.9   | 168.8 | 5.8   | 168.7    | 5.8   |
| $\vartheta^\circ$ | $\beta^{-1}C_4$  | 170.8 | 4.9   | 170.5 | 4.9   | 170.5    | 5.0   |
| $\vartheta^\circ$ | $\alpha^{-4}C_1$ | 11.4  | 6.2   | 11.5  | 6.3   | 11.5     | 6.3   |
| $\vartheta^\circ$ | $\beta^{-4}C_1$  | 14.5  | 7.4   | 14.2  | 7.0   | 14.2     | 7.4   |
| $\varphi^\circ$   | $\alpha^{-1}C_4$ | 134.4 | 70.6  | 137.7 | 70.2  | 137.7    | 70.2  |
| $\varphi^\circ$   | $\beta^{-1}C_4$  | 195.7 | 80.1  | 193.8 | 76.6  | 193.9    | 76.5  |
| $\varphi^\circ$   | $\alpha^{-4}C_1$ | 160.4 | 103.7 | 156.8 | 100.0 | 156.2    | 101.1 |
| $\varphi^\circ$   | $\beta^{-4}C_1$  | 150.5 | 56.2  | 151.2 | 54.4  | 150.7    | 56.2  |
| $Q$               | $\alpha^{-1}C_4$ | 0.53  | 0.04  | 0.53  | 0.04  | 0.53     | 0.04  |
| $Q$               | $\beta^{-1}C_4$  | 0.57  | 0.04  | 0.57  | 0.04  | 0.57     | 0.04  |
| $Q$               | $\alpha^{-4}C_1$ | 0.54  | 0.04  | 0.54  | 0.05  | 0.54     | 0.04  |
| $Q$               | $\beta^{-4}C_1$  | 0.53  | 0.04  | 0.53  | 0.04  | 0.53     | 0.04  |

**S6: Hydroxymethyl rotamer state populations (%), calculated and experimental (EXPT)**

| Isomer | Model    | Anomer   | T ( <i>tg</i> ) | G+ ( <i>gt</i> ) | G- ( <i>gg</i> ) |
|--------|----------|----------|-----------------|------------------|------------------|
| L      | TIP3P    | $\alpha$ | 17              | 14               | 69               |
| L      | TIP3P    | $\beta$  | 18              | 8                | 75               |
| L      | TIP4P    | $\alpha$ | 16              | 23               | 61               |
| L      | TIP4P    | $\beta$  | 17              | 18               | 65               |
| L      | TIP4P-EW | $\alpha$ | 16              | 23               | 61               |
| L      | TIP4P-EW | $\beta$  | 17              | 18               | 65               |
| D      | EXPT     | $\alpha$ | 24              | 76               | 0*               |
| D      | EXPT     | $\beta$  | 29              | 67               | 4*               |

\**gt* and *gg* definitions are reversed in the L-/D-isomers

Estimated experimental error was  $\pm 5\%$

Average populations were calculated from ten 1  $\mu$ s subsets, standard deviations were all  $\leq 1\%$

3D-definitions of hydroxymethyl conformations ( $\alpha$ -L-idopyranoside):

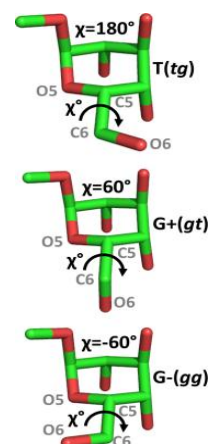

**S7: Expected pyroanse ring vicinal couplings in canonical chair puckers of  $\alpha$ - and  $\beta$ -L-idose**

| $\alpha$  | ${}^1C_4$ | ${}^4C_1$ |
|-----------|-----------|-----------|
| $J_{1,2}$ | <i>g</i>  | <i>t</i>  |
| $J_{2,3}$ | <i>g</i>  | <i>t</i>  |
| $J_{3,4}$ | <i>g</i>  | <i>t</i>  |
| $J_{4,5}$ | <i>g</i>  | <i>g</i>  |

*g=gauche**t=trans*

| $\beta$   | ${}^1C_4$ | ${}^4C_1$ |
|-----------|-----------|-----------|
| $J_{1,2}$ | <i>g</i>  | <i>g</i>  |
| $J_{2,3}$ | <i>g</i>  | <i>t</i>  |
| $J_{3,4}$ | <i>g</i>  | <i>t</i>  |
| $J_{4,5}$ | <i>g</i>  | <i>g</i>  |

**S8: Two-site models**

| Model      | Isomer | Karplus | $\alpha$ -idose |           | $\beta$ -idose |           |
|------------|--------|---------|-----------------|-----------|----------------|-----------|
|            |        |         | ${}^4C_1$       | ${}^1C_4$ | ${}^4C_1$      | ${}^1C_4$ |
| Simulation | L      | n/a     | 5               | 85        | 0              | 100       |
| Rigid      | L      | Ref. 24 | 61              | 39        | 26             | 74        |
| Flexible   | L      | Ref. 24 | 65              | 35        | 24             | 76        |

Rigid models:used "ideal" chairs, ring torsions set to  $\pm 60^\circ$ , all other atoms relaxed using MMFlexible model:used all  ${}^4C_1$  ( $\theta < 30$ ) or  ${}^1C_4$  ( $\theta > 150$ ) chairs from the TIP3P simulations**S9: Chemical shifts for synthesized D isomers of compounds 1 and 2**

| 750 MHz  | ${}^1H$ chemical shift (ppm) |      |      |      |      |      |      |                  |
|----------|------------------------------|------|------|------|------|------|------|------------------|
| Anomer   | H1                           | H2   | H3   | H4   | H5   | H6   | H6'  | OCH <sub>3</sub> |
| $\alpha$ | 4.69                         | 3.53 | 3.73 | 3.75 | 4.09 | 3.82 | 3.79 | 3.45             |
| $\beta$  | 4.74                         | 3.69 | 3.98 | 3.66 | 3.99 | 3.84 | 3.79 | 3.54             |

| 150 MHz  | ${}^{13}C$ chemical shift (ppm) |       |       |       |       |       |                  |
|----------|---------------------------------|-------|-------|-------|-------|-------|------------------|
| Anomer   | C1                              | C2    | C3    | C4    | C5    | C6    | OCH <sub>3</sub> |
| $\alpha$ | 102.66                          | 71.96 | 72.74 | 71.37 | 72.37 | 61.31 | 57.16            |
| $\beta$  | 101.63                          | 70.88 | 71.09 | 69.91 | 76.72 | 62.68 | 58.15            |

The estimated error in  ${}^1H$  chemical shift values is  $\pm 0.002$  ppm

**S10: Convergence of pucker in  $\alpha$ - and  $\beta$ -L-idose during each 10  $\mu$ s simulation**

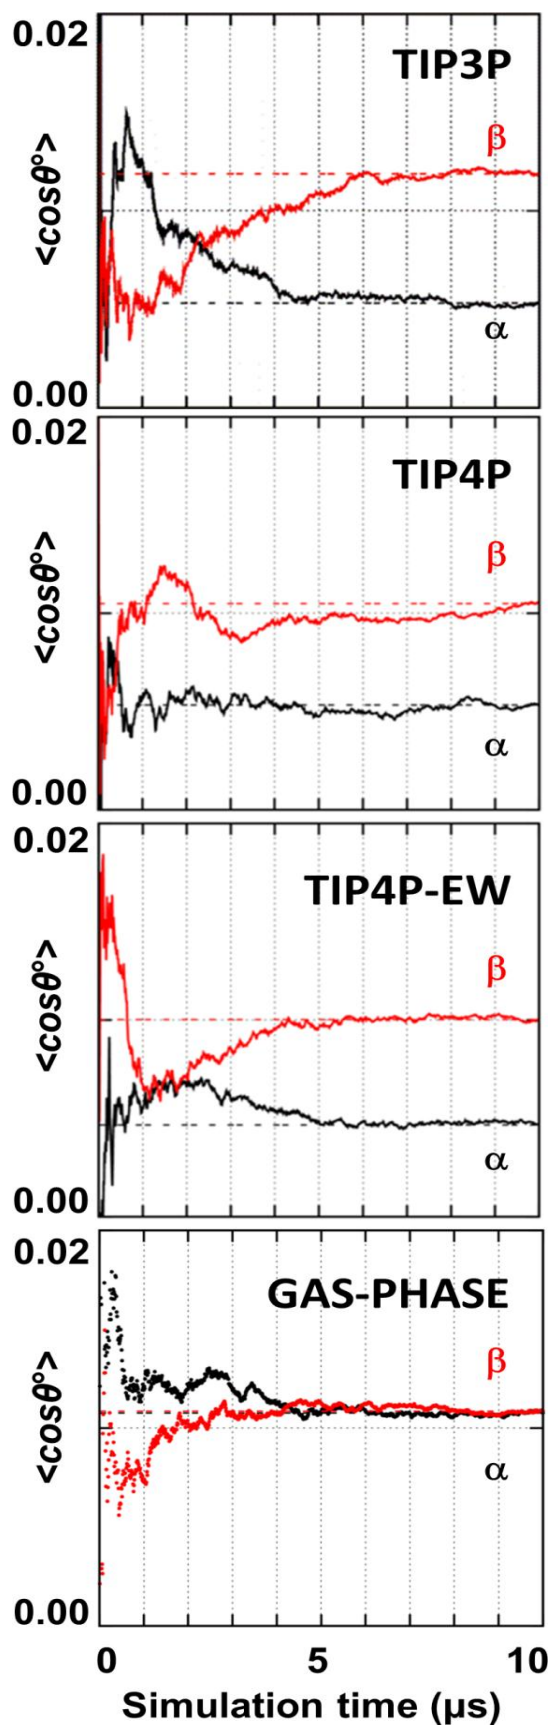

**S11: Time series of the Cremer-Pople parameter  $\vartheta$  in each 10 $\mu$ s simulation**

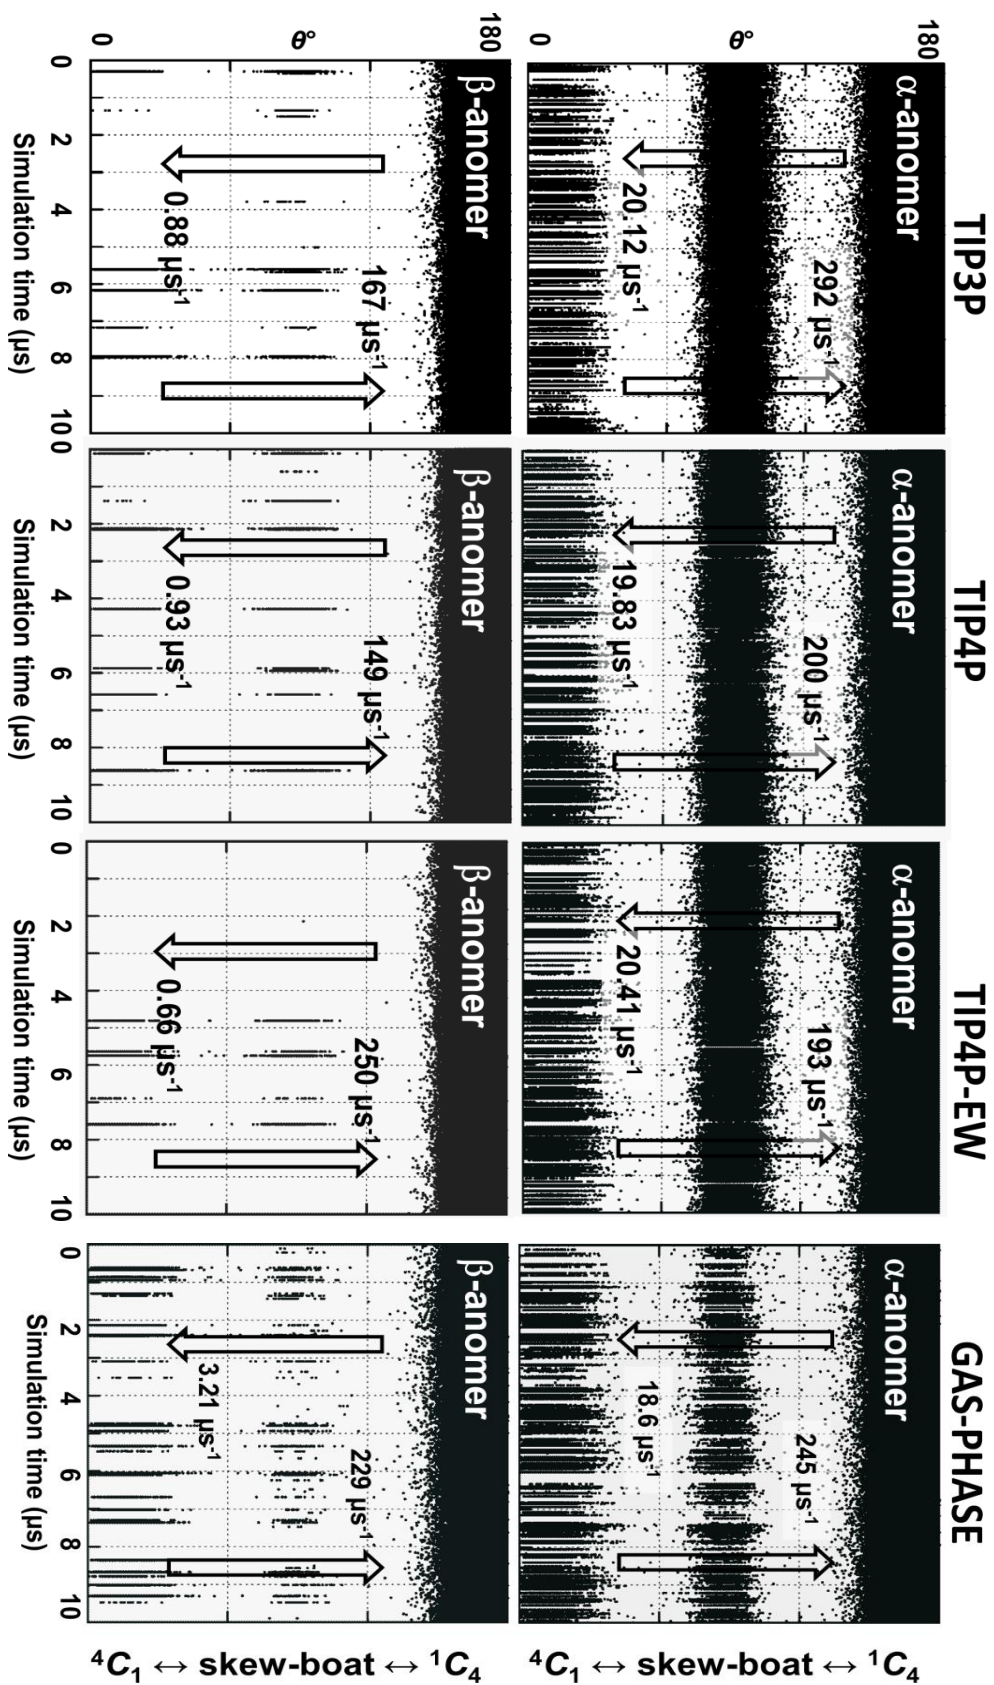

Computed forward ( ${}^1C_4 \rightarrow {}^4C_1$ ) and backward ( ${}^4C_1 \rightarrow {}^1C_4$ ) puckering rates are illustrated



**S12: Sinusoidal projections of Cremer-Pople spherical phase-space for each 10  $\mu$ s simulation**

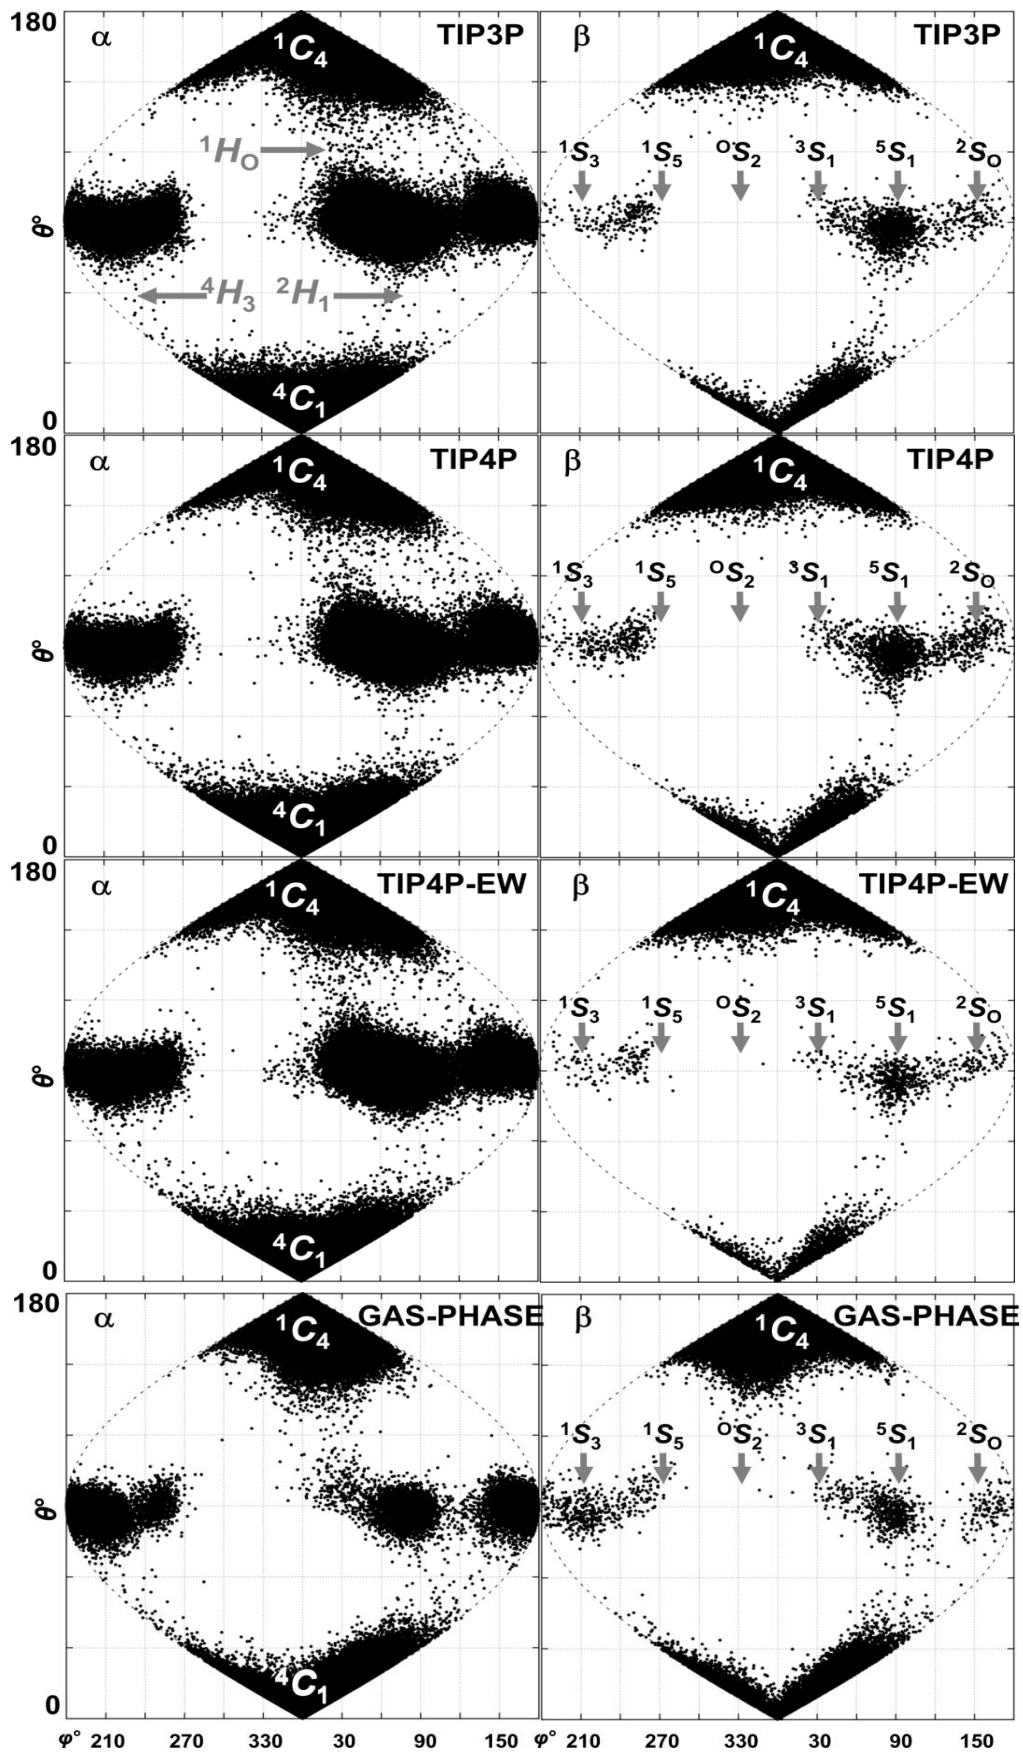

**S13: Relative occupancy of puckers (arbitrary units) in each 10  $\mu$ s simulation**

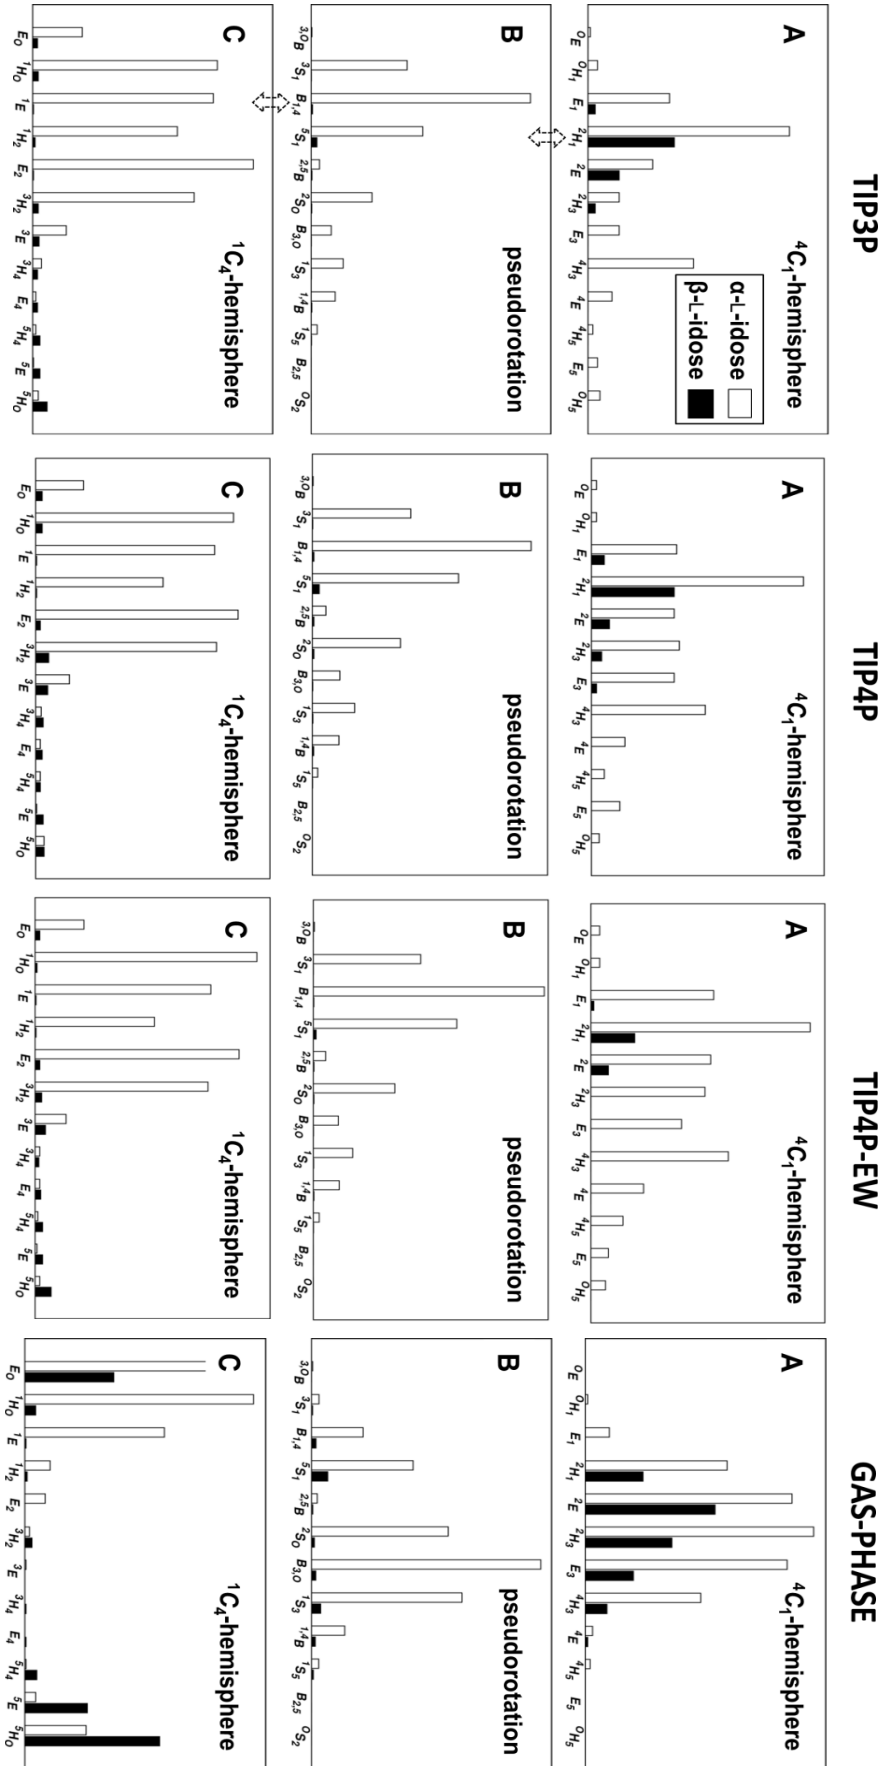

**S14: Classification of the 36 canonical non-chair puckers in terms of  $\vartheta$  and  $\varphi$  angles**

|            |     |   |                   |   |     |   |     |   |                 |   |     |
|------------|-----|---|-------------------|---|-----|---|-----|---|-----------------|---|-----|
| <b>4C1</b> | -1  | < | $\vartheta^\circ$ | < | 36  | & | -16 | < | $\varphi^\circ$ | < | 345 |
| <b>OE</b>  | 36  | < | $\vartheta^\circ$ | < | 72  | & | -16 | < | $\varphi^\circ$ | < | 15  |
| <b>OH1</b> | 36  | < | $\vartheta^\circ$ | < | 72  | & | 15  | < | $\varphi^\circ$ | < | 45  |
| <b>E1</b>  | 36  | < | $\vartheta^\circ$ | < | 72  | & | 45  | < | $\varphi^\circ$ | < | 75  |
| <b>2H1</b> | 36  | < | $\vartheta^\circ$ | < | 72  | & | 75  | < | $\varphi^\circ$ | < | 105 |
| <b>2E</b>  | 36  | < | $\vartheta^\circ$ | < | 72  | & | 105 | < | $\varphi^\circ$ | < | 135 |
| <b>2H3</b> | 36  | < | $\vartheta^\circ$ | < | 72  | & | 135 | < | $\varphi^\circ$ | < | 165 |
| <b>E3</b>  | 36  | < | $\vartheta^\circ$ | < | 72  | & | 165 | < | $\varphi^\circ$ | < | 195 |
| <b>4H3</b> | 36  | < | $\vartheta^\circ$ | < | 72  | & | 195 | < | $\varphi^\circ$ | < | 225 |
| <b>4E</b>  | 36  | < | $\vartheta^\circ$ | < | 72  | & | 225 | < | $\varphi^\circ$ | < | 255 |
| <b>4H5</b> | 36  | < | $\vartheta^\circ$ | < | 72  | & | 255 | < | $\varphi^\circ$ | < | 285 |
| <b>E5</b>  | 36  | < | $\vartheta^\circ$ | < | 72  | & | 285 | < | $\varphi^\circ$ | < | 315 |
| <b>OH5</b> | 36  | < | $\vartheta^\circ$ | < | 72  | & | 315 | < | $\varphi^\circ$ | < | 345 |
| <b>3OB</b> | 72  | < | $\vartheta^\circ$ | < | 108 | & | -16 | < | $\varphi^\circ$ | < | 15  |
| <b>3S1</b> | 72  | < | $\vartheta^\circ$ | < | 108 | & | 15  | < | $\varphi^\circ$ | < | 45  |
| <b>B14</b> | 72  | < | $\vartheta^\circ$ | < | 108 | & | 45  | < | $\varphi^\circ$ | < | 75  |
| <b>5S1</b> | 72  | < | $\vartheta^\circ$ | < | 108 | & | 75  | < | $\varphi^\circ$ | < | 105 |
| <b>25B</b> | 72  | < | $\vartheta^\circ$ | < | 108 | & | 105 | < | $\varphi^\circ$ | < | 135 |
| <b>2SO</b> | 72  | < | $\vartheta^\circ$ | < | 108 | & | 135 | < | $\varphi^\circ$ | < | 165 |
| <b>B30</b> | 72  | < | $\vartheta^\circ$ | < | 108 | & | 165 | < | $\varphi^\circ$ | < | 195 |
| <b>1S3</b> | 72  | < | $\vartheta^\circ$ | < | 108 | & | 195 | < | $\varphi^\circ$ | < | 225 |
| <b>14B</b> | 72  | < | $\vartheta^\circ$ | < | 108 | & | 225 | < | $\varphi^\circ$ | < | 255 |
| <b>1S5</b> | 72  | < | $\vartheta^\circ$ | < | 108 | & | 255 | < | $\varphi^\circ$ | < | 285 |
| <b>B25</b> | 72  | < | $\vartheta^\circ$ | < | 108 | & | 285 | < | $\varphi^\circ$ | < | 315 |
| <b>OS2</b> | 72  | < | $\vartheta^\circ$ | < | 108 | & | 315 | < | $\varphi^\circ$ | < | 345 |
| <b>EO</b>  | 108 | < | $\vartheta^\circ$ | < | 144 | & | -16 | < | $\varphi^\circ$ | < | 15  |
| <b>1HO</b> | 108 | < | $\vartheta^\circ$ | < | 144 | & | 15  | < | $\varphi^\circ$ | < | 45  |
| <b>1E</b>  | 108 | < | $\vartheta^\circ$ | < | 144 | & | 45  | < | $\varphi^\circ$ | < | 75  |
| <b>1H2</b> | 108 | < | $\vartheta^\circ$ | < | 144 | & | 75  | < | $\varphi^\circ$ | < | 105 |
| <b>E2</b>  | 108 | < | $\vartheta^\circ$ | < | 144 | & | 105 | < | $\varphi^\circ$ | < | 135 |
| <b>3H2</b> | 108 | < | $\vartheta^\circ$ | < | 144 | & | 135 | < | $\varphi^\circ$ | < | 165 |
| <b>3E</b>  | 108 | < | $\vartheta^\circ$ | < | 144 | & | 165 | < | $\varphi^\circ$ | < | 195 |
| <b>3H4</b> | 108 | < | $\vartheta^\circ$ | < | 144 | & | 195 | < | $\varphi^\circ$ | < | 225 |
| <b>E4</b>  | 108 | < | $\vartheta^\circ$ | < | 144 | & | 225 | < | $\varphi^\circ$ | < | 255 |
| <b>5H4</b> | 108 | < | $\vartheta^\circ$ | < | 144 | & | 255 | < | $\varphi^\circ$ | < | 285 |
| <b>5E</b>  | 108 | < | $\vartheta^\circ$ | < | 144 | & | 285 | < | $\varphi^\circ$ | < | 315 |
| <b>5HO</b> | 108 | < | $\vartheta^\circ$ | < | 144 | & | 315 | < | $\varphi^\circ$ | < | 345 |
| <b>1C4</b> | 144 | < | $\vartheta^\circ$ | < | 180 | & | -16 | < | $\varphi^\circ$ | < | 345 |

## S15: Vicinal coupling calculations

Parameters used (for  $\alpha$ - and  $\beta$ -anomers) in the Karplus equation (Ref. 24)

|               | $\Delta\chi_1$ | $\Delta\chi_2$ | $\Delta\chi_3$ | $\Delta\chi_4$ | P1    | P2    | P3   | P4   | P5    | P6   |
|---------------|----------------|----------------|----------------|----------------|-------|-------|------|------|-------|------|
| ${}^3J_{1-2}$ | 1.30           | 1.30           | 1.30           | 0.40           | 13.24 | -0.91 | 0.00 | 0.53 | -2.41 | 0.27 |
| ${}^3J_{2-3}$ | 0.40           | 1.30           | 0.40           | 1.30           | 13.24 | -0.91 | 0.00 | 0.53 | -2.41 | 0.27 |
| ${}^3J_{3-4}$ | 1.30           | 0.40           | 1.30           | 0.40           | 13.24 | -0.91 | 0.00 | 0.53 | -2.41 | 0.27 |
| ${}^3J_{4-5}$ | 0.40           | 1.30           | 0.40           | 1.30           | 13.24 | -0.91 | 0.00 | 0.53 | -2.41 | 0.27 |

$${}^3J_{\text{HH}} = P_1 \cos^2\vartheta + P_2 \cos\vartheta + P_3 + \sum \Delta\chi_i [P_4 + P_5 \cos^2(\zeta_i \vartheta + P_6 |\Delta\chi_i|)]$$

$\zeta_i$  is +1 or -1 depending on the substituent orientation (see ref. 24 for details)

**Pyranose ring vicinal 1H-1H dihedrals**

**averages ( $\theta^\circ$ ) and standard deviations ( $\pm$ ) from the 10  $\mu\text{s}$  simulations**

### TIP3P

| Torsion | $\alpha$       |       | $\beta$        |       |
|---------|----------------|-------|----------------|-------|
|         | $\theta^\circ$ | $\pm$ | $\theta^\circ$ | $\pm$ |
| H1-H2   | 77             | 51    | -54            | 11    |
| H2-H3   | -80            | 37    | -67            | 12    |
| H3-H4   | 73             | 34    | 67             | 11    |
| H4-H5   | 50             | 25    | 54             | 9     |

### TIP4P

| Torsion | $\alpha$       |       | $\beta$        |       |
|---------|----------------|-------|----------------|-------|
|         | $\theta^\circ$ | $\pm$ | $\theta^\circ$ | $\pm$ |
| H1-H2   | 64             | 69    | -45            | 34    |
| H2-H3   | -68            | 62    | -57            | 41    |
| H3-H4   | 63             | 58    | 57             | 41    |
| H4-H5   | 40             | 41    | 46             | 33    |

### TIP4P-EW

| Torsion | $\alpha$       |       | $\beta$        |       |
|---------|----------------|-------|----------------|-------|
|         | $\theta^\circ$ | $\pm$ | $\theta^\circ$ | $\pm$ |
| H1-H2   | 65             | 70    | -46            | 33    |
| H2-H3   | -68            | 62    | -57            | 40    |
| H3-H4   | 64             | 58    | 57             | 40    |
| H4-H5   | 40             | 41    | 46             | 33    |

**S16: GLYCAM11 paramaters for residue OiA ( $\alpha$ -L-idopyranose)**

| OiA |      | new atom type OA: endo-anomeric oxygen |   |    |    |    |       |       |        |        |
|-----|------|----------------------------------------|---|----|----|----|-------|-------|--------|--------|
| 1   | DUMM | DU                                     | M | 0  | -1 | -2 | 0     | 0     | 0      | 0      |
| 2   | DUMM | DU                                     | M | 1  | 0  | -1 | 1.522 | 0     | 0      | 0      |
| 3   | DUMM | DU                                     | M | 2  | 1  | 0  | 1.422 | 109.5 | 0      | 0      |
| 4   | C1   | CG                                     | M | 3  | 2  | 1  | 1.4   | 113.3 | -60    | 0.4405 |
| 5   | H1   | H2                                     | E | 4  | 3  | 2  | 1.102 | 110.7 | 56.2   | 0      |
| 6   | O5   | OA                                     | M | 4  | 3  | 2  | 1.435 | 107.9 | -66.3  | -0.543 |
| 7   | C5   | CG                                     | M | 6  | 4  | 3  | 1.434 | 114.3 | -59.5  | 0.283  |
| 8   | H5   | H1                                     | E | 7  | 6  | 4  | 1.105 | 109.1 | 60.8   | 0      |
| 9   | C6   | CG                                     | 3 | 7  | 6  | 4  | 1.517 | 106.7 | 177.2  | 0.264  |
| 10  | H61  | H1                                     | E | 9  | 7  | 6  | 1.092 | 108.3 | 65.1   | 0      |
| 11  | H62  | H1                                     | E | 9  | 7  | 6  | 1.093 | 108.8 | 177.1  | 0      |
| 12  | O6   | OH                                     | S | 9  | 7  | 6  | 1.413 | 112.7 | -56.7  | -0.678 |
| 13  | H6O  | HO                                     | E | 12 | 9  | 7  | 0.955 | 108.1 | -96    | 0.4205 |
| 14  | C4   | CG                                     | M | 7  | 6  | 4  | 1.519 | 110.8 | -59    | 0.2625 |
| 15  | H4   | H1                                     | E | 14 | 7  | 6  | 1.1   | 107.7 | 173.8  | 0      |
| 16  | O4   | OH                                     | S | 14 | 7  | 6  | 1.43  | 110   | -66.6  | -0.702 |
| 17  | H4O  | HO                                     | E | 16 | 14 | 7  | 0.958 | 109.2 | 6.1    | 0.432  |
| 18  | C3   | CG                                     | M | 14 | 7  | 6  | 1.529 | 110.3 | 54.4   | 0.2935 |
| 19  | H3   | H1                                     | E | 18 | 14 | 7  | 1.101 | 109.2 | -173.5 | 0      |
| 20  | O3   | OH                                     | S | 18 | 14 | 7  | 1.421 | 106.9 | 67.3   | -0.733 |
| 21  | H3O  | HO                                     | E | 20 | 18 | 14 | 0.976 | 108.5 | -168.6 | 0.439  |
| 22  | C2   | CG                                     | B | 18 | 14 | 7  | 1.524 | 111.6 | -53.4  | 0.308  |
| 23  | H2   | H1                                     | E | 22 | 18 | 14 | 1.105 | 110.2 | 172.2  | 0      |
| 24  | O2   | OH                                     | S | 22 | 18 | 14 | 1.415 | 110.8 | -65.2  | -0.734 |
| 25  | H2O  | HO                                     | E | 24 | 22 | 18 | 0.957 | 110   | -44.9  | 0.439  |

**S17: GLYCAM11 paramaters for residue OiB ( $\beta$ -L-idopyranose)**

| OiB |      | new atom type OA: endo-anomeric oxygen |   |    |    |    |       |       |        |         |   |
|-----|------|----------------------------------------|---|----|----|----|-------|-------|--------|---------|---|
| 1   | DUMM | DU                                     | M | 0  | -1 | -2 | 0     | 0     | 0      | 0       | 0 |
| 2   | DUMM | DU                                     | M | 1  | 0  | -1 | 1.522 | 0     | 0      | 0       | 0 |
| 3   | DUMM | DU                                     | M | 2  | 1  | 0  | 1.422 | 109.5 | 0      | 0       | 0 |
| 4   | C1   | CG                                     | M | 3  | 2  | 1  | 1.4   | 113.3 | 180    | 0.469   | 0 |
| 5   | H1   | H2                                     | E | 4  | 3  | 2  | 1.102 | 110   | -60.7  | 0       | 0 |
| 6   | C2   | CG                                     | M | 4  | 3  | 2  | 1.529 | 109.7 | 180    | 0.221   | 0 |
| 7   | H2   | H1                                     | E | 6  | 4  | 3  | 1.105 | 108.8 | 66     | 0       | 0 |
| 8   | O2   | OH                                     | S | 6  | 4  | 3  | 1.415 | 110   | -59.2  | -0.689  | 0 |
| 9   | H2O  | HO                                     | E | 8  | 6  | 4  | 0.957 | 110   | -89.3  | 0.436   | 0 |
| 10  | C3   | CG                                     | M | 6  | 4  | 3  | 1.519 | 110.1 | -173.1 | 0.3255  | 0 |
| 11  | H3   | H1                                     | E | 10 | 6  | 4  | 1.101 | 109.1 | 173.3  | 0       | 0 |
| 12  | O3   | OH                                     | S | 10 | 6  | 4  | 1.421 | 109.9 | -65.8  | -0.737  | 0 |
| 13  | H3O  | HO                                     | E | 12 | 10 | 6  | 0.976 | 108.5 | -172.4 | 0.4375  | 0 |
| 14  | C4   | CG                                     | M | 10 | 6  | 4  | 1.528 | 110.8 | 53.3   | 0.238   | 0 |
| 15  | H4   | H1                                     | E | 14 | 10 | 6  | 1.1   | 108.7 | -173.1 | 0       | 0 |
| 16  | O4   | OH                                     | S | 14 | 10 | 6  | 1.43  | 110.6 | 66.4   | -0.707  | 0 |
| 17  | H4O  | HO                                     | E | 16 | 14 | 10 | 0.958 | 109.2 | 60     | 0.432   | 0 |
| 18  | C5   | CG                                     | M | 14 | 10 | 6  | 1.435 | 110   | -52.7  | 0.3165  | 0 |
| 19  | H5   | H1                                     | E | 18 | 14 | 10 | 1.105 | 109.6 | -66.3  | 0       | 0 |
| 20  | O5   | OA                                     | E | 18 | 14 | 10 | 1.412 | 112   | 54.9   | -0.556  | 0 |
| 21  | C6   | CG                                     | 3 | 18 | 14 | 10 | 1.517 | 111.3 | 174.2  | 0.262   | 0 |
| 22  | H61  | H1                                     | E | 21 | 18 | 14 | 1.092 | 108.9 | -63.1  | 0       | 0 |
| 23  | H62  | H1                                     | E | 21 | 18 | 14 | 1.093 | 108.3 | 55.9   | 0       | 0 |
| 24  | O6   | OH                                     | S | 21 | 18 | 14 | 1.413 | 112.7 | 172.7  | -0.6755 | 0 |
| 25  | H6O  | HO                                     | E | 24 | 21 | 18 | 0.955 | 108.1 | 58.1   | 0.421   | 0 |

## S18: GLYCAM11 torsional parameters for new atom type OA

### Key:

|             |                                                                         |
|-------------|-------------------------------------------------------------------------|
| <b>DIV</b>  | factor by which torsion is divided                                      |
| <b>BH/2</b> | barrier height divided by a factor of 2                                 |
| <b>PH</b>   | phase shift angle in the torsional function (°)                         |
| <b>PN</b>   | torsional barrier periodicity                                           |
|             | if PN is negative (identifies the next term) the absolute value is used |

| <b>Torsion</b> | <b>DIV</b> | <b>BH/2</b> | <b>PH</b> | <b>PN</b> |
|----------------|------------|-------------|-----------|-----------|
| H2-CG-OA-CG    | 1          | -1.20       | 0         | 1         |
|                | 1          | 0.10        | 0         | 2         |
|                | 1          | 0.02        | 0         | 3         |
| CG-CG-OA-CG    | 1          | -0.70       | 0         | 1         |
|                | 1          | -0.30       | 0         | 2         |
| OE-CG-OA-CG    | 1          | -0.33       | 0         | 3         |
|                | 1          | -0.25       | 0         | 1         |
|                | 1          | -0.76       | 0         | 2         |
| OA-CG-CG-CG    | 1          | 1.20        |           | 3         |
|                | 1          | 0.19        | 0         | 1         |
|                | 1          | -0.11       | 0         | 2         |
|                | 1          | 0.14        | 0         | 3         |

**S19: Reaction scheme for synthesis of (1) and (2)**

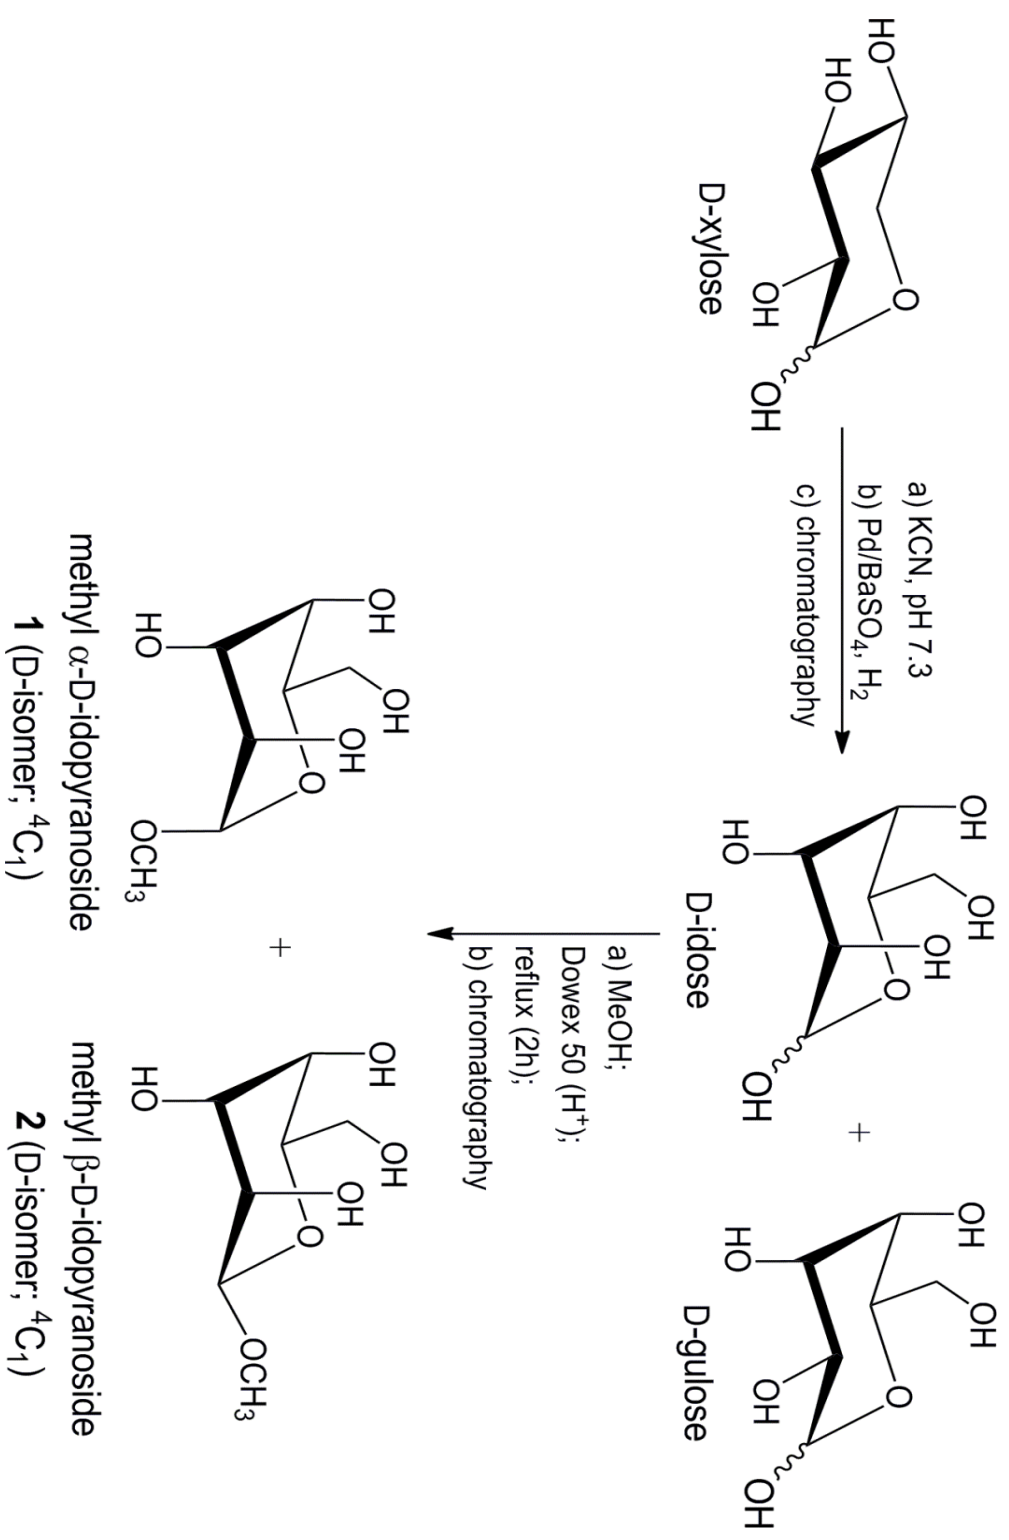

Supplement: NIHMS380027-supplement-1_si_001.pdf [file NIHMS380027-supplement-1_si_001.pdf]
